# Supplementary material
Source: HighWire-hosted journal article supplement (https://cmaj.ca/highwire/filestream/69263/field_highwire_adjunct_files/0/170817-res-1-at.pdf)
Supplement: 170817-res-1-at.pdf [file 170817-res-1-at.pdf]

## Appendix 1 (as supplied by the authors): Supplementary tables and figure

Supplemental Figure 1: Flowchart of people included in study cohort and outcomes

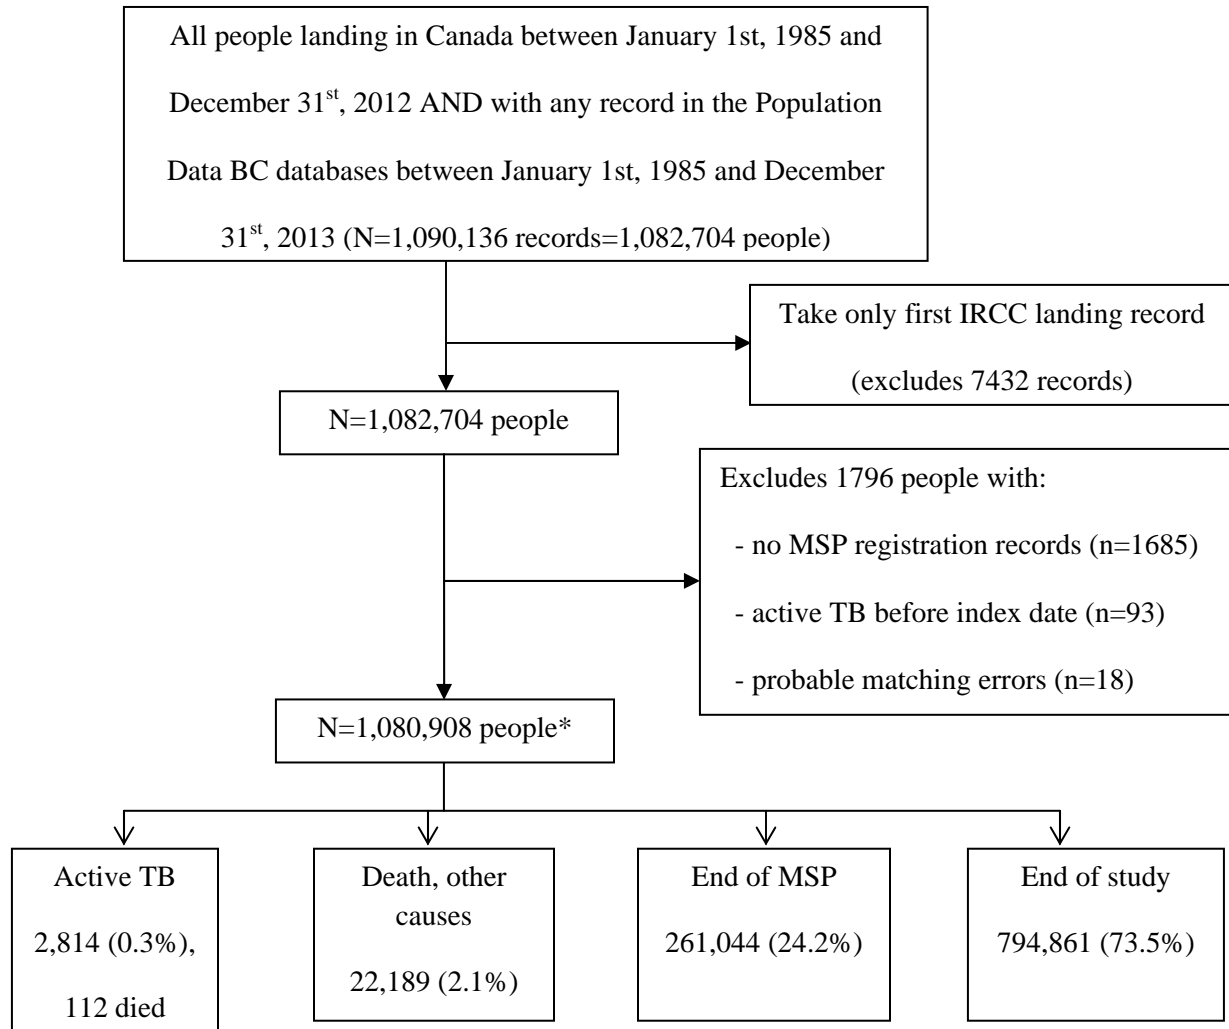

Note: BC = British Columbia, IRCC = Immigration, Refugees and Citizenship Canada, MSP = Medical Services Plan, TB = tuberculosis. \*Total person-years of follow-up (11,639,876) and 10 years (0,28) median (min,max) in cohort, per person

Appendix 1, supplemental Table 1: TB incidence rate in BC, stratified by country or territory of birth \*

| Birth country or territory                                      | TB incidence rate in BC<br>(# cases/100,000 py) | # TB cases in BC |
|-----------------------------------------------------------------|-------------------------------------------------|------------------|
| <b><i>WHO Region: Africa (320,114 person-years in BC)</i></b>   | <b>31.5</b>                                     | <b>101</b>       |
| Algeria                                                         | 0.0                                             | 0                |
| Angola                                                          | 0.0                                             | 0                |
| Burundi                                                         | 198.0                                           | <5               |
| Congo, Democratic Republic                                      | 48.7                                            | <5               |
| Eritrea                                                         | 415.8                                           | 9                |
| Ethiopia                                                        | 149.8                                           | 51               |
| Ghana                                                           | 8.2                                             | <5               |
| Kenya                                                           | 32.0                                            | 11               |
| Liberia                                                         | 41.7                                            | <5               |
| Malawi                                                          | 0.0                                             | 0                |
| Mauritius                                                       | 0.0                                             | 0                |
| Mozambique                                                      | 0.0                                             | 0                |
| Namibia                                                         | 0.0                                             | 0                |
| Nigeria                                                         | 16.2                                            | <5               |
| Rwanda                                                          | 59.7                                            | <5               |
| Sierra Leone                                                    | 93.2                                            | <5               |
| South Africa                                                    | 3.5                                             | 5                |
| Tanzania                                                        | 6.8                                             | <5               |
| Uganda                                                          | 12.1                                            | <5               |
| Zambia                                                          | 41.7                                            | <5               |
| Zimbabwe                                                        | 21.2                                            | <5               |
| <b><i>WHO Region: Americas (839,285 person-years in BC)</i></b> | <b>5.8</b>                                      | <b>49</b>        |
| Argentina                                                       | 0.0                                             | 0                |
| Barbados                                                        | 37.0                                            | <5               |
| Bermuda                                                         | 0.0                                             | 0                |
| Bolivia                                                         | 0.0                                             | 0                |
| Brazil                                                          | 11.5                                            | <5               |
| Chile                                                           | 11.8                                            | <5               |
| Colombia                                                        | 14.1                                            | 5                |
| Costa Rica                                                      | 0.0                                             | 0                |
| Cuba                                                            | 0.0                                             | 0                |
| Dominican Republic                                              | 40.4                                            | <5               |
| Ecuador                                                         | 0.0                                             | 0                |
| El Salvador                                                     | 7.4                                             | 7                |
| Grenada                                                         | 0.0                                             | 0                |
| Guatemala                                                       | 17.8                                            | 6                |

|                                                                    |             |            |
|--------------------------------------------------------------------|-------------|------------|
| Guyana                                                             | 33.5        | <5         |
| Haiti                                                              | 18.0        | <5         |
| Honduras                                                           | 0.0         | 0          |
| Jamaica                                                            | 0.0         | 0          |
| Mexico                                                             | 8.6         | 7          |
| Nicaragua                                                          | 8.0         | <5         |
| Panama                                                             | 0.0         | 0          |
| Paraguay                                                           | 27.7        | <5         |
| Peru                                                               | 23.4        | 8          |
| Saint Vincent and the Grenadines                                   | 0.0         | 0          |
| Trinidad and Tobago                                                | 6.5         | <5         |
| United States of America                                           | 0.6         | <5         |
| Uruguay                                                            | 0.0         | 0          |
| Venezuela                                                          | 0.0         | 0          |
| <b>WHO Region: East Mediterranean (777,698 person-years in BC)</b> | <b>17.2</b> | <b>134</b> |
| Afghanistan                                                        | 49.6        | 27         |
| Bahrain                                                            | 0.0         | 0          |
| Egypt                                                              | 0.0         | 0          |
| Iran                                                               | 5.6         | 23         |
| Iraq                                                               | 9.1         | <5         |
| Jordan                                                             | 0.0         | 0          |
| Kuwait                                                             | 0.0         | 0          |
| Lebanon                                                            | 0.0         | 0          |
| Libya                                                              | 0.0         | 0          |
| Morocco                                                            | 27.8        | <5         |
| Oman                                                               | 0.0         | 0          |
| Pakistan                                                           | 24.0        | 28         |
| Saudi Arabia                                                       | 0.0         | 0          |
| Somalia                                                            | 177.7       | 35         |
| Sudan                                                              | 108.8       | 14         |
| Syria                                                              | 0.0         | 0          |
| Tunisia                                                            | 0.0         | 0          |
| United Arab Emirates                                               | 0.0         | 0          |
| <b>WHO Region: Europe (1,595,156 person-years in BC)</b>           | <b>3.7</b>  | <b>59</b>  |
| Albania                                                            | 0.0         | 0          |
| Armenia                                                            | 0.0         | 0          |
| Austria                                                            | 0.0         | 0          |
| Azerbaijan                                                         | 0.0         | 0          |
| Azores                                                             | 0.0         | 0          |
| Belarus                                                            | 0.0         | 0          |
| Belgium                                                            | 0.0         | 0          |
| Bosnia and Herzegovina                                             | 8.2         | <5         |
| Bulgaria                                                           | 0.0         | 0          |

|                                                                  |             |            |
|------------------------------------------------------------------|-------------|------------|
| Croatia                                                          | 0.0         | 0          |
| Cyprus                                                           | 0.0         | 0          |
| Czech Republic                                                   | 0.0         | 0          |
| Czechoslovakia                                                   | 2.8         | <5         |
| Denmark                                                          | 0.0         | 0          |
| Estonia                                                          | 0.0         | 0          |
| Finland                                                          | 0.0         | 0          |
| France                                                           | 0.0         | 0          |
| Georgia                                                          | 0.0         | 0          |
| Germany                                                          | 0.7         | <5         |
| Greece                                                           | 13.2        | <5         |
| Hungary                                                          | 3.1         | <5         |
| Ireland                                                          | 4.3         | <5         |
| Israel                                                           | 0.0         | 0          |
| Italy                                                            | 0.0         | 0          |
| Kazakhstan                                                       | 0.0         | 0          |
| Kyrgyzstan                                                       | 0.0         | 0          |
| Latvia                                                           | 0.0         | 0          |
| Lithuania                                                        | 0.0         | 0          |
| Macedonia, FYR                                                   | 0.0         | 0          |
| Moldova                                                          | 18.7        | <5         |
| Netherlands                                                      | 5.7         | <5         |
| Norway                                                           | 0.0         | 0          |
| Palestinian Authority (Gaza/West Bank)                           | 0.0         | 0          |
| Poland                                                           | 3.5         | 6          |
| Portugal                                                         | 0.0         | 0          |
| Romania                                                          | 10.3        | 11         |
| Russia                                                           | 2.6         | <5         |
| Serbia and Montenegro                                            | 6.2         | 6          |
| Serbia, Republic of                                              | 0.0         | 0          |
| Slovak Republic                                                  | 0.0         | 0          |
| Slovenia                                                         | 0.0         | 0          |
| Spain                                                            | 0.0         | 0          |
| Sweden                                                           | 0.0         | 0          |
| Switzerland                                                      | 0.0         | 0          |
| Turkey                                                           | 10.1        | <5         |
| UK and colonies                                                  | 2.9         | 12         |
| Ukraine                                                          | 9.7         | 5          |
| Union of Soviet Socialist Republics                              | 2.7         | <5         |
| Uzbekistan                                                       | 0.0         | 0          |
| Unknown                                                          | 0.0         | 0          |
| Yugoslavia                                                       | 0.0         | 0          |
| <b>WHO Region: Southeast Asia (1,631,137 person-years in BC)</b> | <b>42.8</b> | <b>698</b> |

|                                                                   |             |             |
|-------------------------------------------------------------------|-------------|-------------|
| Bangladesh                                                        | 42.6        | 10          |
| India                                                             | 43.1        | 626         |
| Indonesia                                                         | 39.0        | 17          |
| Myanmar (Burma)                                                   | 110.9       | 19          |
| Nepal                                                             | 42.9        | <5          |
| Sri Lanka                                                         | 11.9        | 6           |
| Thailand                                                          | 46.6        | 17          |
| <b>WHO Region: Western Pacific (6,476,478 person-years in BC)</b> | <b>27.4</b> | <b>1773</b> |
| Australia                                                         | 1.9         | <5          |
| Brunei                                                            | 17.1        | <5          |
| Cambodia                                                          | 106.5       | 26          |
| China                                                             | 28.2        | 540         |
| Fiji                                                              | 5.0         | 8           |
| Hong Kong                                                         | 18.7        | 232         |
| Japan                                                             | 6.4         | 8           |
| Laos                                                              | 49.0        | <5          |
| Macao                                                             | 36.6        | 14          |
| Malaysia                                                          | 12.0        | 11          |
| Mongolia                                                          | 0.0         | 0           |
| New Zealand                                                       | 0.0         | 0           |
| Philippines                                                       | 50.1        | 529         |
| Singapore                                                         | 3.3         | <5          |
| South Korea                                                       | 16.9        | 87          |
| Taiwan                                                            | 6.8         | 56          |
| Vietnam                                                           | 78.4        | 249         |

Note: BC = British Columbia, TB = tuberculosis, WHO = World Health Organization.

\*Reporting of country/territory-level TB incidence rates limited to those with at least 1000 person-years of follow-up time in BC

Appendix 1, supplemental Table 2: Demographic-based risk groups for development of TB within 10 years after index date, identified through recursive partitioning\*†

| Age at index, years | TB incidence, birth country (#TB/ 100,000 population) | Immigration class                         | TB cases | People  | % with TB |
|---------------------|-------------------------------------------------------|-------------------------------------------|----------|---------|-----------|
| 0-11                | 0-50                                                  | Any                                       | 0        | 24,833  | 0.0       |
| 12-64               | 0-34                                                  | Any                                       | 19       | 88,778  | 0.0       |
| 12-64               | 34-50                                                 | Any                                       | 17       | 27,952  | 0.1       |
| 0-5                 | 51-132                                                | Any                                       | 1        | 17,777  | 0.0       |
| 6-17                | 51-132                                                | Any                                       | 33       | 64,755  | 0.1       |
| 18-53               | 51-120                                                | Any                                       | 154      | 129,798 | 0.1       |
| 18-53               | 121-132                                               | Any                                       | 118      | 56,066  | 0.2       |
| 54-64               | 51-132                                                | Any                                       | 54       | 13,233  | 0.4       |
| 0-10                | >132                                                  | Business, skilled worker                  | 5        | 14,709  | 0.0       |
| 11-64               | 133-348                                               | Business                                  | 40       | 25,299  | 0.2       |
| 11-29               | 133-348                                               | Skilled worker                            | 40       | 12,642  | 0.2       |
| 30-64               | 133-348                                               | Skilled worker                            | 40       | 21,692  | 0.3       |
| 11-64               | >348                                                  | Business, skilled worker                  | 102      | 27,785  | 0.4       |
| 0-17                | 133-224                                               | Refugee, family, live-in caregiver, other | 24       | 11,362  | 0.2       |
| 18-56               | 133-214                                               | Refugee, family, live-in caregiver, other | 115      | 24,817  | 0.5       |
| 18-56               | 215-224                                               | Refugee, family, live-in caregiver, other | 161      | 48,650  | 0.3       |
| 57-64               | 133-224                                               | Refugee, family, live-in caregiver, other | 87       | 12,808  | 0.7       |
| 0-17                | >224                                                  | Refugee, family, live-in caregiver, other | 44       | 10,135  | 0.4       |
| 18-35               | >224                                                  | Family, live-in caregiver, other          | 117      | 20,667  | 0.6       |
| 36-64               | >224                                                  | Family, live-in caregiver, other          | 88       | 10,835  | 0.8       |
| 18-64               | >224                                                  | Refugee                                   | 114      | 11,701  | 1.0       |
|                     |                                                       |                                           | 1,373    | 676,294 | 0.2       |

\* Analysis including people with index years 1985-2003 and age<65 at index date (N=676,294)

†Recursive partitioning can describe complex nonlinearities and interactions between the outcome and potential predictor variables without requiring *a priori* specification of the nature of these relationships (Therneau T and Atkinson E. An introduction to recursive partitioning using the RPART routines (<https://cran.r-project.org/web/packages/rpart/vignettes/longintro.pdf>)).
